# Supplementary material for: Pseudonocardia Pini Sp. Nov., An Endophytic Actinobacterium Isolated From Roots of the Pine Tree Callitris Preissii
Source: Research Square preprint supplement (doi:10.21203/rs.3.rs-274242/v1), 2021-03-16
Supplement: Supplementary file 1 [file dd3ad6a0080e93ec0c2c2789.docx]

Supplementary Table S2. The distribution of BCGs of *Pseudonocardia pini* CAP47RT

| Gene type | product | Span (nt) | Gene similarity | Most similar biosynthetic gene cluster | similarity |
| --- | --- | --- | --- | --- | --- |
| NRPS Siderophore | bacillibactin siderophore | 1 - 4,385 | 60% | *Pseudonocardia autotrophica* NRRL B-16064 | 15% |
| Polyketide | alkylresorcinol  ([antioxidant activities](https://www.sciencedirect.com/topics/agricultural-and-biological-sciences/antioxidant-activity)) | 1 - 1,868 | 100% | *Streptomyces afghaniensis* 772 STAFG | 12% |
| Other | ectoine | 1 - 7,862 | 100% | *Pseudonocardia autotrophica* NRRL B-16064 | 80% |
